# Supplementary material
Source: Springer Nature journal article supplement (https://www.springermedizin.de/resource/supplementary/12911_2011_624_MOESM4_ESM.pdf/9525928)
Supplement: MOESM4 [file 9525928]

## ISSUE:

Delay to visit patient

## BACKGROUND

Lab, echo and lung function report are essential for pre anaesthesia check up

Anaesthetist goes to the ward after 3 pm to visit the patient

PC is used by nurse to work with other HIS Nurses in the ward also uses room

## CURRENT CONDITION

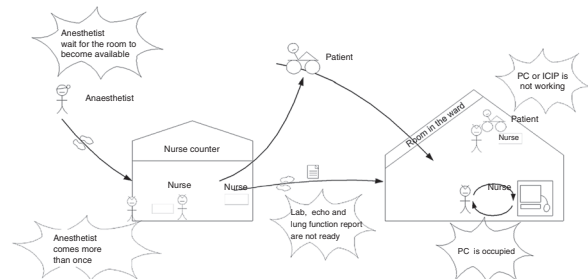

## PROBLEM ANALYSIS

### 1. Room is occupied

Why? The other nurse visit another patient in the room

Why? There is not many rooms available for nurse to visit patient

Why? Nurse do not know that anaesthetist comes and needs the room

Why? There is no schedule that when anaesthetist comes

### 2. Anaesthetist comes more than once to visit the patient

Why? Patient is not available

Why? Patient is in lab or any other places

Why? It was not arranged with patient to be ready during the time anaesthetist comes to the ward

### 3. PC is occupied

Why? It is used by other nurse to access other HIS

Why? There is not enough PC at nurse counter for nurses

Why? Nurse do not know anaesthetist comes to the ward to use ICIP

### 4. PC or ICIP is not working

Why? PC or ICIP is down

Why? The previous person used the system and left it inaccessible

Why? Nobody comes and check whether the system is working properly before anaesthetist comes

Why? Nobody in the ward is familiar with computer and ICIP

Why? Technical people check the system periodically instead of daily

### 5. Lab, echo or lung function report are not ready

Why? Anaesthetist do not know that the reports are not ready

Why? Nobody notify him

## TARGET CONDITION

|      |                   |
|------|-------------------|
| TO   | Clinical Director |
| BY   | HOD anaesthesia   |
| DATE | July 2011         |

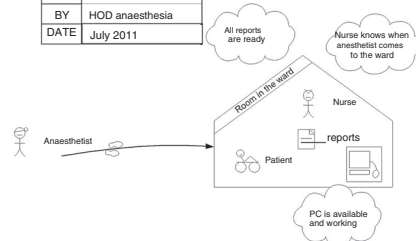

## COUNTERMEASURES

Duration of time for anaesthetist to visit the patient

Number of time patient is ready and anaesthetist not ready

Number of time anaesthetist is ready but the patient or reports/ICIP is not ready

## IMPLEMENTATION PLAN

| What                                 | Who               | Duration | Outcome              |
|--------------------------------------|-------------------|----------|----------------------|
| Inform nurses about new work process | Clinical Director | 0.5 hour | Reduce waiting waste |

## FOLLOW UP

|                                   |                    |
|-----------------------------------|--------------------|
| Cost                              | \$\$\$             |
| Man/hour                          | \$\$\$             |
| Benefit                           | \$\$\$             |
| Reduce waste time of anaesthetist | Intangible benefit |
| Improve time to patient care      | Intangible benefit |

## TEST

Monitor staff attendance during training

Monitor the new workflow and participant in new process which includes anaesthetist and nurse
